# Supplementary material for: Designing luminescent diimine-Cu(i)–phosphine complexes by tuning N-ligand and counteranions: correlation of weak interactions, luminescence and THz absorption spectra
Source: Royal Society of Chemistry journal article supplement (doi:10.1039/d1ce01574e), 2022-01-01
Supplement: d1ce01574e1.pdf [file d1ce01574e1.pdf]

## Supporting Information

# Designing luminescent diimine-Cu (I)-phosphine complexes by tuning N-ligand counteranions: correlation of weak interactions, luminescence and THz absorption spectra

*Zhen-Zhou Sun, †<sup>a</sup> Ning Zhu, †<sup>a</sup> Xun Pan, <sup>a</sup> Guo Wang, <sup>a</sup> Yu-Ping Yang, <sup>b</sup> Qi-Ming*

*Qiu, <sup>c</sup> Zhong-Feng Li, <sup>a</sup> Xiu-Lan Xin, <sup>d</sup> Jian-Ming Liu, <sup>e</sup> Xiao-Qi Li, <sup>a</sup> Qiong-Hua Jin,*

*\*<sup>a,f</sup> Zhi-Gang Ren, \*<sup>g</sup> and Qing-Li Zhou, \*<sup>h</sup>*

<sup>a</sup> Department of Chemistry, Capital Normal University, Beijing 100048, China, E-mail:

[jinqh@cnu.edu.cn](mailto:jinqh@cnu.edu.cn), [jinqh204@163.com](mailto:jinqh204@163.com)

<sup>b</sup> School of Science, Minzu University of China, Beijing 100081, China

<sup>c</sup> School of Science, China University of Geosciences, Beijing 100083, China, E-mail:

[qiuqiming890521@163.com](mailto:qiuqiming890521@163.com)

<sup>d</sup> School of Light Industry, Beijing Technology and Business University, Beijing 100048, China

<sup>e</sup> School of Mathematical Sciences, Peking University, Beijing 100871, China

<sup>f</sup> State Key Laboratory of Structural Chemistry Fujian Institute of Research on the Structure of Matter, Chinese Academy of Science Fuzhou, Fujian 350002, China

<sup>g</sup> College of Chemistry, Chemical Engineering and Materials Science, Soochow University, Suzhou 215123, China, E-mail: [renzhigang@suda.edu.cn](mailto:renzhigang@suda.edu.cn)

<sup>h</sup> Key Laboratory of Terahertz Optoelectronics, Ministry of Education, and Beijing Advanced Innovation Center for Imaging Theory and Technology, Department of Physics, Capital Normal University, Beijing 100048, China, E-mail: [qlzhou@cnu.edu.cn](mailto:qlzhou@cnu.edu.cn)

## Table of Contents

**Fig. S1.** The PXRD patterns for complex **1**: simulated from single crystal data (Black) and single-phase polycrystalline sample (Red).

**Fig. S2.** The PXRD patterns for complex **2**: simulated from single crystal data (Black) and single-phase polycrystalline sample (Red).

**Fig. S3.** The PXRD patterns for complex **3**: simulated from single crystal data (Black) and single-phase polycrystalline sample (Red).

**Fig. S4.** The PXRD patterns for complex **4**: simulated from single crystal data (Black) and single-phase polycrystalline sample (Red).

**Fig. S5.** The PXRD patterns for complex **5**: simulated from single crystal data (Black) and single-phase polycrystalline sample (Red).

**Fig. S6.** The PXRD patterns for complex **6**: simulated from single crystal data (Black) and single-phase polycrystalline sample (Red).

**Fig. S7.** Thermal stability curves for complexes **1, 2, 3, 5**.

**Fig. S8.** Coordination environment of Cu(I) for **1**. Thermal ellipsoids drawn at the 30% probability level. All hydrogen atoms are omitted for clarity.

**Fig. S9.** Coordination environment of Cu(I) for **2**. Thermal ellipsoids drawn at the 30% probability

level. All hydrogen atoms and solvent molecules are omitted for clarity.

**Fig. S10.** Coordination environment of Cu(I) for **3**. Thermal ellipsoids drawn at the 30% probability level. All hydrogen atoms are omitted for clarity.

**Fig. S11.** Coordination environment of Cu(I) for **4**. Thermal ellipsoids drawn at the 30% probability level. All hydrogen atoms are omitted for clarity.

**Fig. S12.** Coordination environment of Cu(I) for **5**. Thermal ellipsoids drawn at the 30% probability level. All hydrogen atoms are omitted for clarity.

**Fig. S13.** Coordination environment of Cu(I) for **6**. Thermal ellipsoids drawn at the 30% probability level. All hydrogen atoms are omitted for clarity.

**Fig. S14.** Weak hydrogen bonds in **3**, including C-H $\cdots$ F bonds (C2-H2 $\cdots$ F1<sup>i</sup>, 2.44 Å, C19-H19 $\cdots$ F4<sup>ii</sup>, 2.41 Å, C20-H20B $\cdots$ F3<sup>iii</sup>, 2.47 Å, C33-H33A $\cdots$ F4<sup>iii</sup>, 2.52 Å, C35-H35 $\cdots$ F3<sup>iii</sup>, 2.49 Å, C42-H42 $\cdots$ F2, 2.40 Å, Symmetric codes: <sup>i</sup> 1/2-x, 1/2-y, 1/2-z; <sup>ii</sup> 1-x, 1-y, 1-z; <sup>iii</sup> x, -1+y, z).

**Fig. S15.** Weak hydrogen bonds in **4**, including C-H $\cdots$ O bonds (C9-H9 $\cdots$ O4<sup>i</sup>, 2.50 Å, C17-H17 $\cdots$ O1<sup>ii</sup>, 2.46 Å, C20-H20A $\cdots$ O2, 2.54 Å, C33-H33B $\cdots$ O1, 2.54 Å, C36-H36 $\cdots$ O3<sup>iii</sup>, 2.44 Å, C45-H45 $\cdots$ O2, 2.57 Å, Symmetric codes: <sup>i</sup> 1-x, 1/2+y, 1/2-z; <sup>ii</sup> 1-x, 1-y, 1-z; <sup>iii</sup> -1/2+x, 1-y, z).

**Fig. S16.** Weak hydrogen bonds in **5**, including C-H $\cdots$ F bonds (C1-H1 $\cdots$ F1, 2.32 Å, C3-H3 $\cdots$ F4<sup>i</sup>, 2.24 Å, C10-H10 $\cdots$ F2<sup>ii</sup>, 2.49 Å, C13-H13A $\cdots$ F1, 2.49 Å, C14-H14B $\cdots$ F1, 2.49 Å, C29-H29 $\cdots$ F1<sup>iii</sup>, 2.53 Å, C34-H34 $\cdots$ F3<sup>ii</sup>, 2.36 Å, Symmetric codes: <sup>i</sup> 2-x, 2-y, 1-z; <sup>ii</sup> -1+x, y, z; <sup>iii</sup> 2-x, 1-y, 1-z).

**Fig. S17.** Weak hydrogen bonds in **6**, including C-H $\cdots$ O bonds (C2-H2B $\cdots$ O2, 2.55 Å, C18-H18 $\cdots$ O1<sup>i</sup>, 2.55 Å, C32-H32 $\cdots$ O3<sup>i</sup>, 2.53 Å, C39-H39 $\cdots$ O4<sup>ii</sup>, 2.37 Å, C41-H41 $\cdots$ O2, 2.37 Å, Symmetric codes: <sup>i</sup> 1+x, y, z; <sup>ii</sup> 1-x, 1-y, -z).

**Fig. S18.** UV-vis absorption spectra for ligands in CH<sub>2</sub>Cl<sub>2</sub> at room temperature.

**Fig. S19.** Solid-state UV-vis spectra for complexes **1-6**.

**Table S1.** Crystallographic data for **1-6**.

**Table S2.** Selected bond length (Å) and angles (°) for **1-6**.

**Table S3.** Intermolecular  $\pi$ - $\pi$  interactions for complex **1**

**Table S4.** Intermolecular C-H $\cdots$  $\pi$  interactions for complex **2**.

**Table S5.** Intermolecular  $\pi$ - $\pi$  interactions for complex **3**

**Table S6.** Intermolecular C-H $\cdots$  $\pi$  interactions for complex **3**.

**Table S7** Hydrogen bonds in asymmetric units for complexes **3**.

**Table S8.** Intermolecular  $\pi$ - $\pi$  interactions for complex **4**

**Table S9.** Intermolecular C-H $\cdots$  $\pi$  interactions for complex **4**.

**Table S10** Hydrogen bonds in asymmetric units for complexes **4**.

**Table S11.** Intermolecular  $\pi$ - $\pi$  interactions for complex **5**

**Table S12.** Intermolecular C-H $\cdots$  $\pi$  interactions for complex **5**.

**Table S13** Hydrogen bonds in asymmetric units for complexes **5**.

**Table S14.** Intermolecular  $\pi$ - $\pi$  interactions for complex **6**

**Table S15** Hydrogen bonds in asymmetric units for complexes **6**.

**Table S16.** Energy, oscillator strength and major contribution of the calculated transitions for **1-6**.

**Table S17.** Calculated molecular frontier orbital energy / eV for **1-6**.

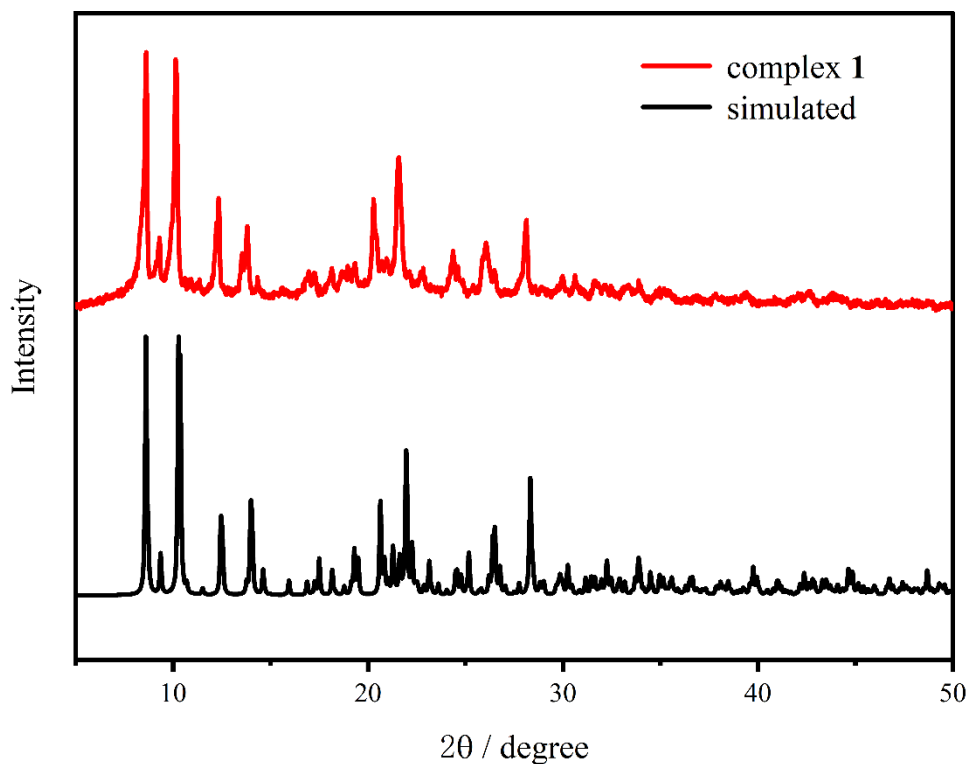

**Fig. S1.** The PXRD patterns for complex 1: simulated from single crystal data (Black) and single-phase polycrystalline sample (Red).

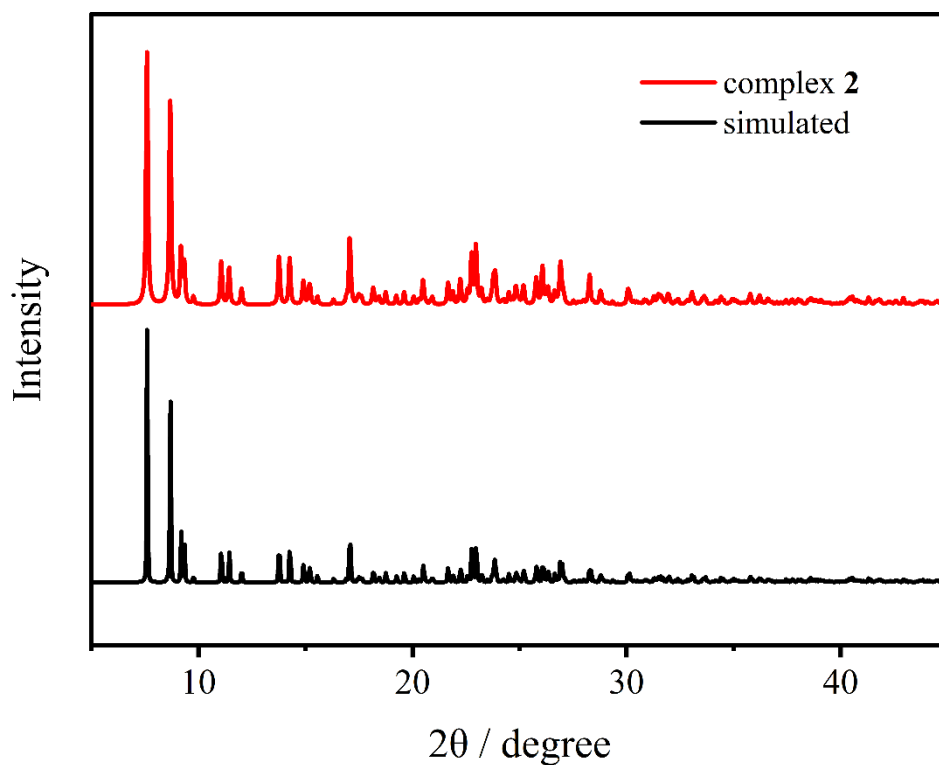

**Fig. S2.** The PXRD patterns for complex 2: simulated from single crystal data (Black) and single-phase polycrystalline sample (Red).

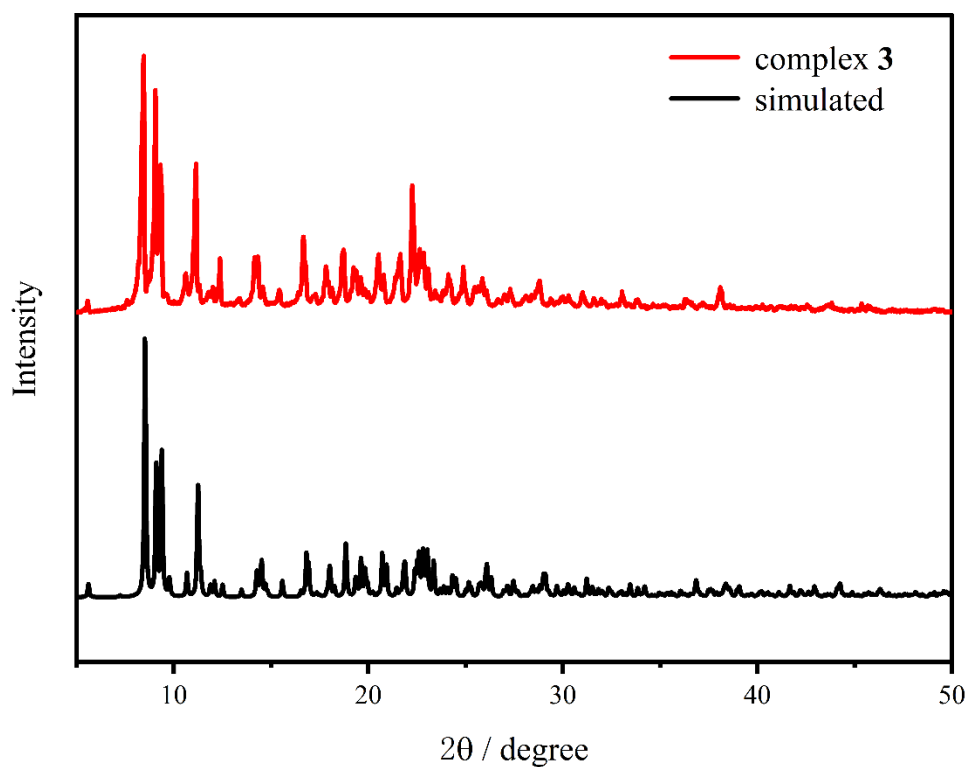

**Fig. S3.** The PXR D patterns for complex 3: simulated from single crystal data (Black) and single-phase polycrystalline sample (Red).

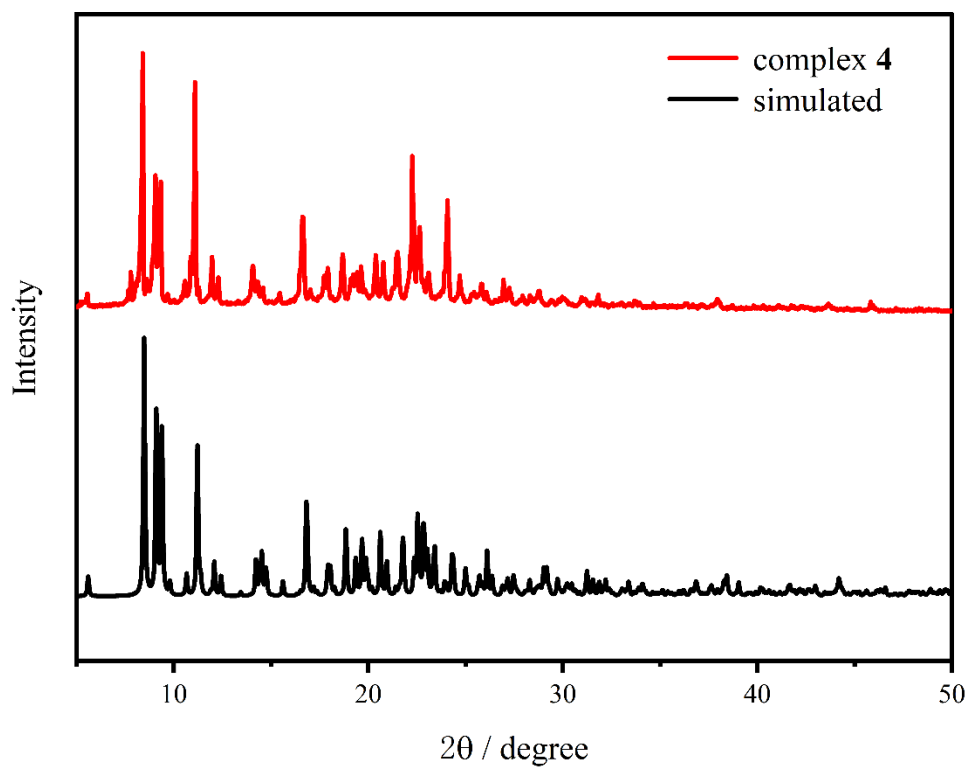

**Fig. S4.** The PXR D patterns for complex 4: simulated from single crystal data (Black) and single-phase polycrystalline sample (Red).

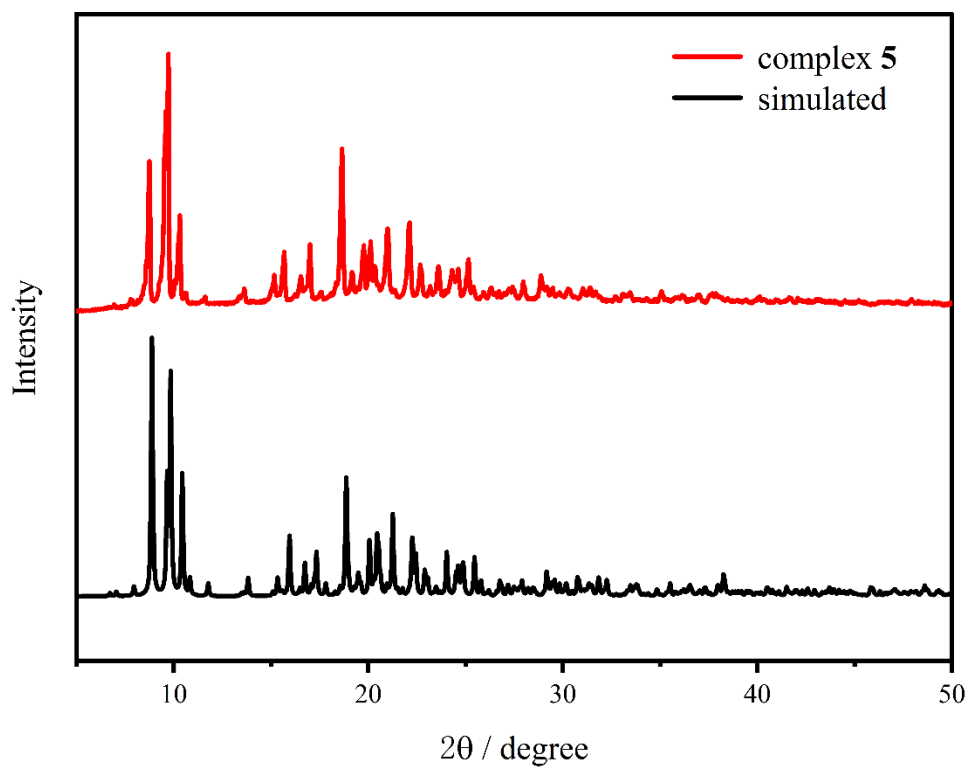

**Fig. S5.** The PXRd patterns for complex 5: simulated from single crystal data (Black) and single-phase polycrystalline sample (Red).

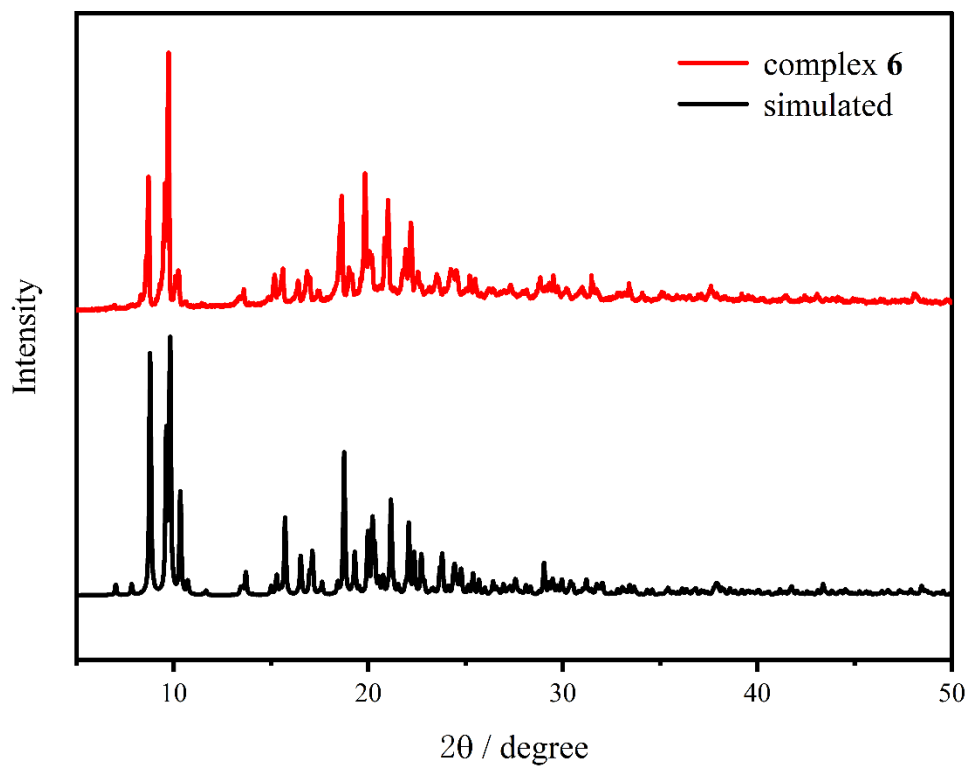

**Fig. S6.** The PXRd patterns for complex 6: simulated from single crystal data (Black) and single-phase polycrystalline sample (Red).

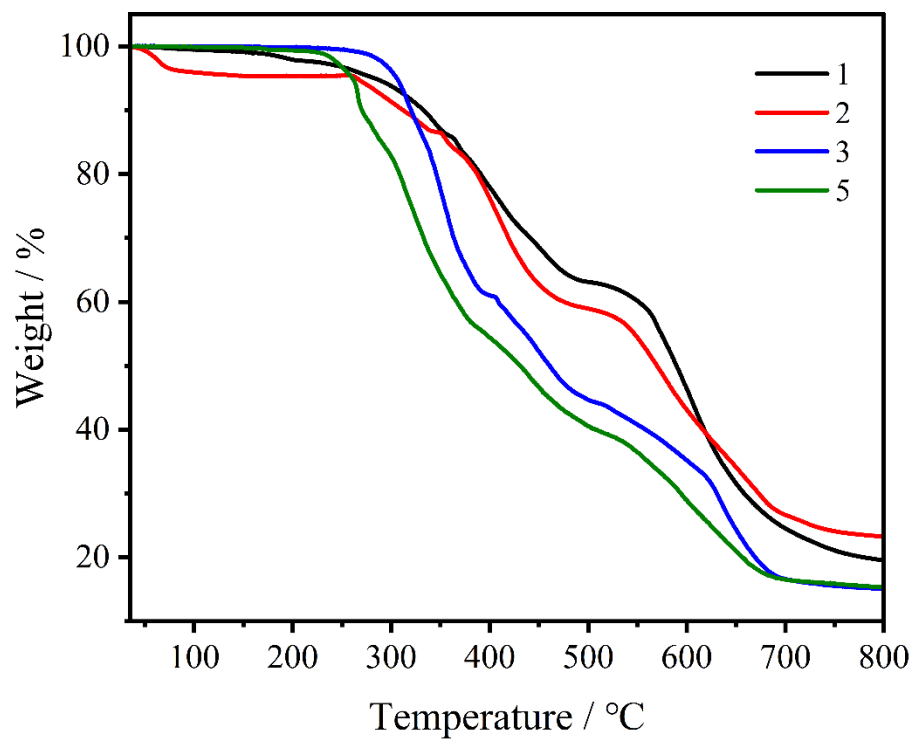

**Fig. S7.** Thermal stability curves for complexes 1, 2, 3, 5.



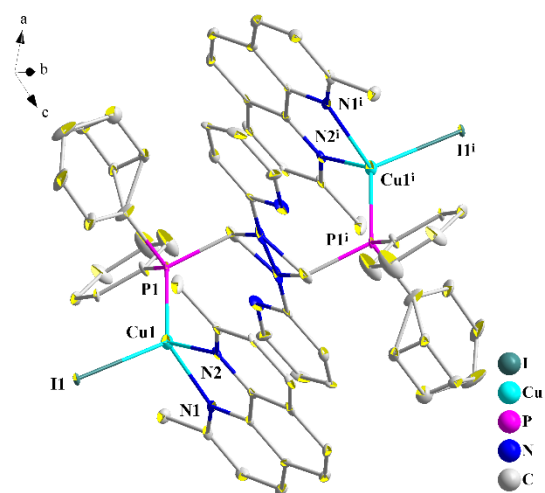

**Fig. S8.** Coordination environment of Cu(I) for **1**. Thermal ellipsoids drawn at the 30% probability level. All hydrogen atoms are omitted for clarity Symmetric codes: <sup>i</sup> 2-x, 1-y, 1-z.

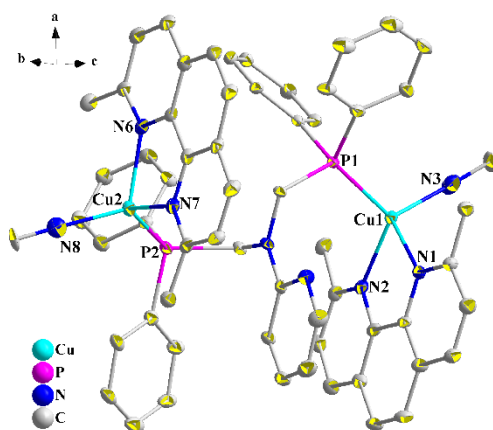

**Fig. S9.** Coordination environment of Cu(I) for **2**. Thermal ellipsoids drawn at the 30% probability level. All hydrogen atoms and solvent molecules are omitted for clarity.

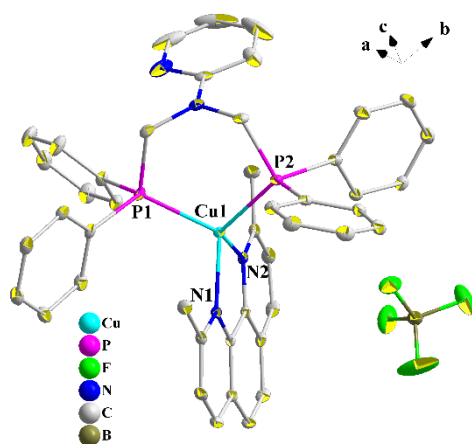

**Fig. S10.** Coordination environment of Cu(I) for **3**. Thermal ellipsoids drawn at the 30% probability level. All hydrogen atoms are omitted for clarity.

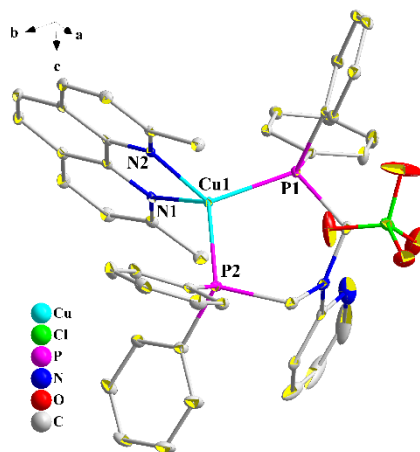

**Fig. S11.** Coordination environment of Cu(I) for **4**. Thermal ellipsoids drawn at the 30% probability level. All hydrogen atoms are omitted for clarity.

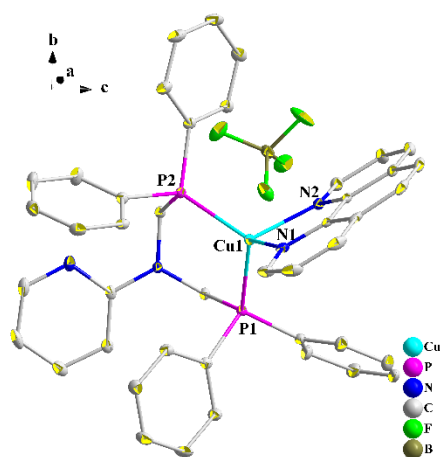

**Fig. S12.** Coordination environment of Cu(I) for **5**. Thermal ellipsoids drawn at the 30% probability level. All hydrogen atoms are omitted for clarity.

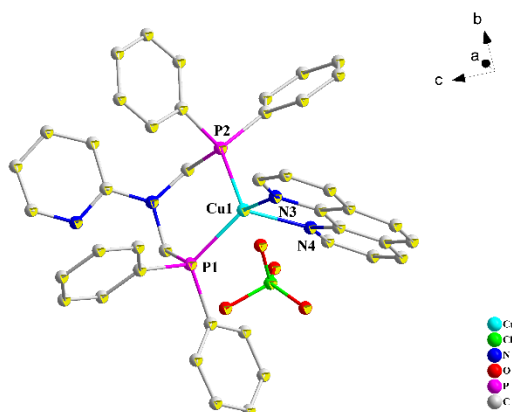

**Fig. S13.** Coordination environment of Cu(I) for **6**. Thermal ellipsoids drawn at the 30% probability level. All hydrogen atoms are omitted for clarity.

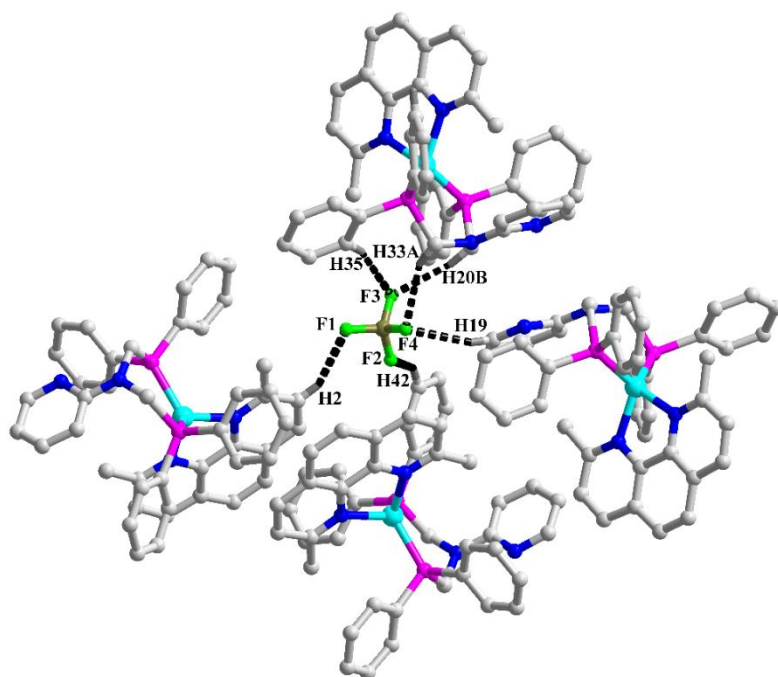

**Fig. S14.** Weak hydrogen bonds in **3**, including C-H...F bonds (C2-H2...F1<sup>i</sup>, 2.44 Å, C19-H19...F4<sup>ii</sup>, 2.41 Å, C20-H20B...F3<sup>iii</sup>, 2.47 Å, C33-H33A...F4<sup>iii</sup>, 2.52 Å, C35-H35...F3<sup>iii</sup>, 2.49 Å, C42-H42...F2, 2.40 Å, Symmetric codes: <sup>i</sup> 1/2-x, 1/2-y, 1/2-z; <sup>ii</sup> 1-x, 1-y, 1-z; <sup>iii</sup> x, -1+y, z).

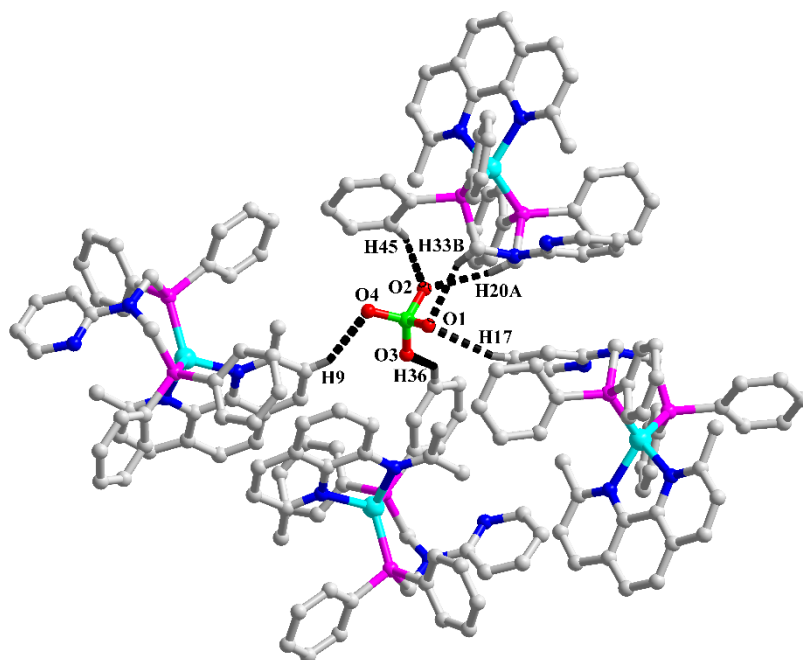

**Fig. S15.** Weak hydrogen bonds in **4**, including C-H...O bonds (C9-H9...O4<sup>i</sup>, 2.50 Å, C17-H17...O1<sup>ii</sup>, 2.46 Å, C20-H20A...O2, 2.54 Å, C33-H33B...O1, 2.54 Å, C36-H36...O3<sup>iii</sup>, 2.44 Å, C45-H45...O2, 2.57 Å, Symmetric codes: <sup>i</sup> 1-x, 1/2+y, 1/2-z; <sup>ii</sup> 1-x, 1-y, 1-z; <sup>iii</sup> -1/2+x, 1-y, z).

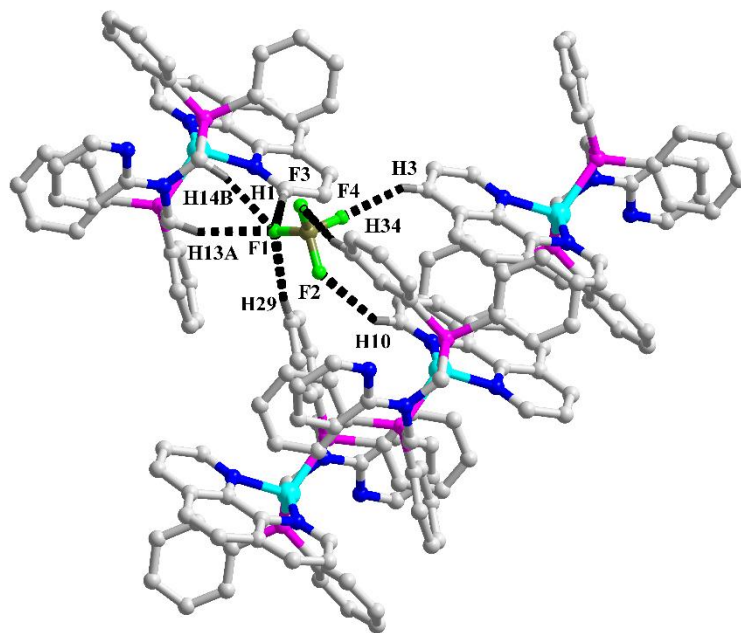

**Fig. S16.** Weak hydrogen bonds in **5**, including C-H...F bonds (C1-H1...F1, 2.32 Å, C3-H3...F4<sup>i</sup>, 2.24 Å, C10-H10...F2<sup>ii</sup>, 2.49 Å, C13-H13A...F1, 2.49 Å, C14-H14B...F1, 2.49 Å, C29-H29...F1<sup>iii</sup>, 2.53 Å, C34-H34...F3<sup>ii</sup>, 2.36 Å, Symmetric codes: <sup>i</sup> 2-x, 2-y, 1-z; <sup>ii</sup> -1+x, y, z; <sup>iii</sup> 2-x, 1-y, 1-z).

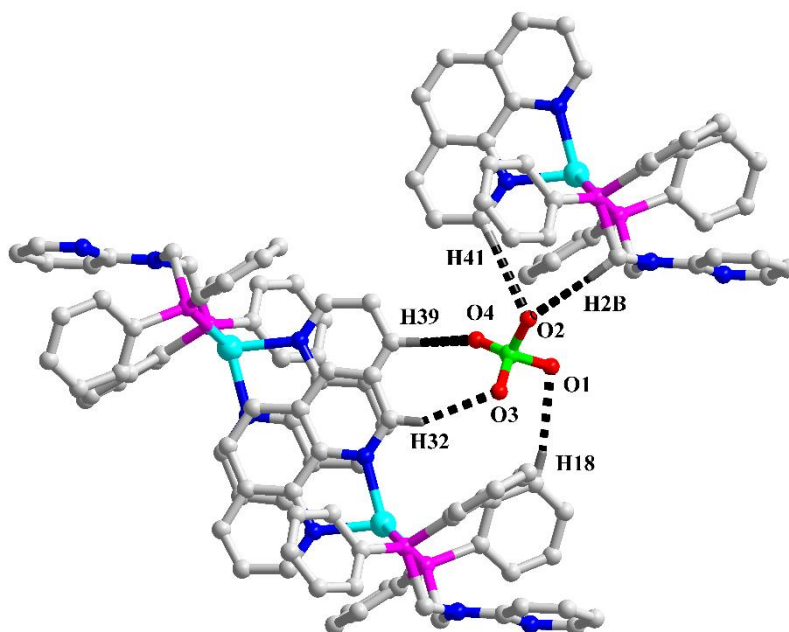

**Fig. S17.** Weak hydrogen bonds in **6**, including C-H...O bonds (C2-H2B...O2, 2.55 Å, C18-H18...O1<sup>i</sup>, 2.55 Å, C32-H32...O3<sup>i</sup>, 2.53 Å, C39-H39...O4<sup>ii</sup>, 2.37 Å, C41-H41...O2, 2.37 Å, Symmetric codes: <sup>i</sup> 1+x, y, z; <sup>ii</sup> 1-x, 1-y, -z).

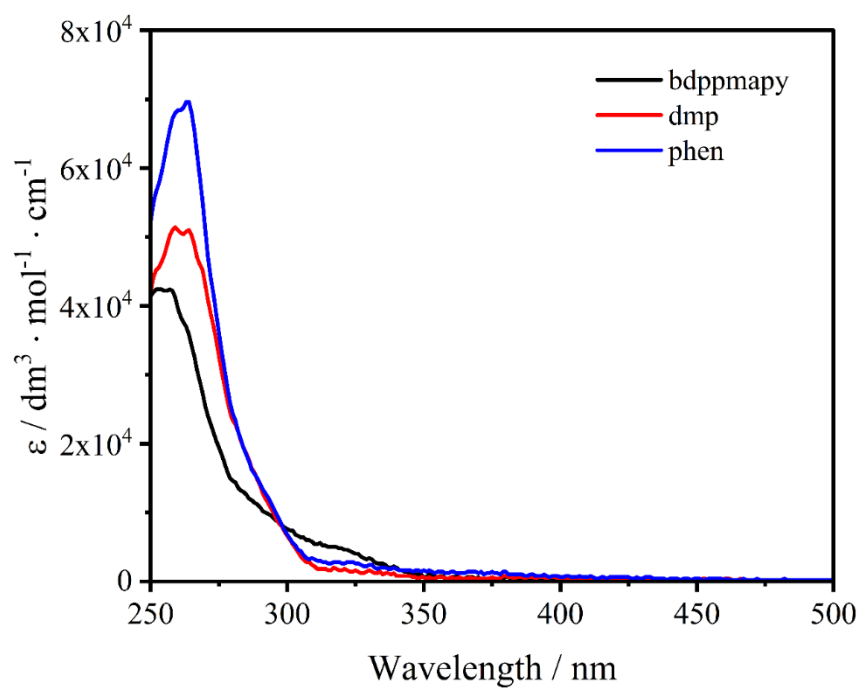

**Fig. S18.** UV-vis absorption spectra for ligands in  $\text{CH}_2\text{Cl}_2$  at room temperature.

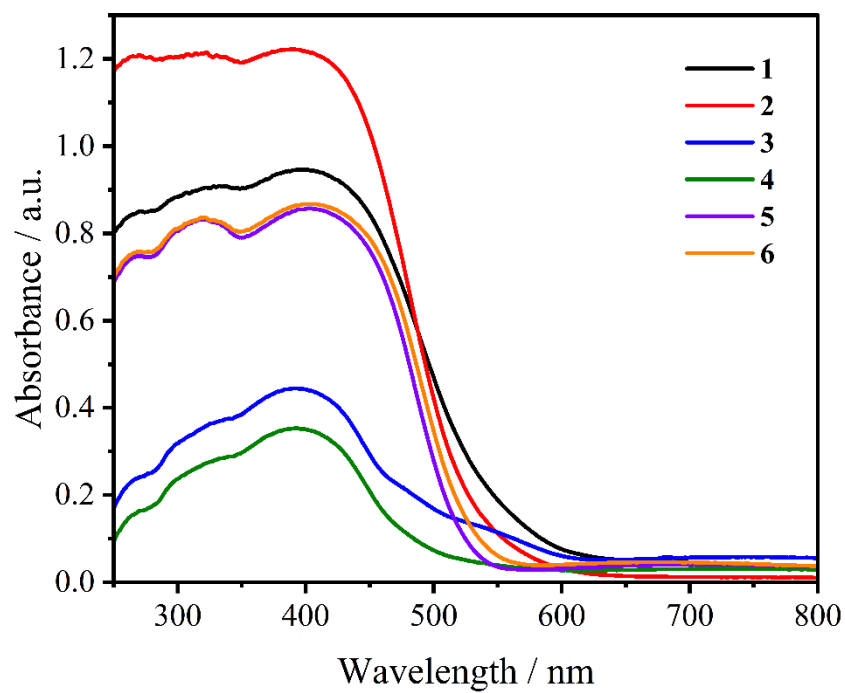

**Fig. S19.** Solid-state UV-vis spectra for complexes 1-6.

**Table S1.** Crystallographic data for **1-6**.

| Complex                                                            | 1                                                                                               | 2                                                                                               | 3                                                                                   | 4                                                                                   | 5                                                                                   | 6                                                                                   |
|--------------------------------------------------------------------|-------------------------------------------------------------------------------------------------|-------------------------------------------------------------------------------------------------|-------------------------------------------------------------------------------------|-------------------------------------------------------------------------------------|-------------------------------------------------------------------------------------|-------------------------------------------------------------------------------------|
| Formula                                                            | C <sub>59</sub> H <sub>52</sub> Cu <sub>2</sub> I <sub>2</sub><br>N <sub>6</sub> P <sub>2</sub> | C <sub>64</sub> H <sub>64</sub> Cu <sub>2</sub> N <sub>8</sub><br>O <sub>3</sub> P <sub>2</sub> | C <sub>45</sub> H <sub>40</sub> BCu<br>F <sub>4</sub> N <sub>4</sub> P <sub>2</sub> | C <sub>45</sub> H <sub>40</sub> ClCuN<br><sub>4</sub> O <sub>4</sub> P <sub>2</sub> | C <sub>43</sub> H <sub>36</sub> BCu<br>F <sub>4</sub> N <sub>4</sub> P <sub>2</sub> | C <sub>43</sub> H <sub>36</sub> CuN <sub>4</sub><br>P <sub>2</sub> ClO <sub>4</sub> |
| Formula weight                                                     | 1287.88                                                                                         | 1182.23                                                                                         | 849.10                                                                              | 861.74                                                                              | 821.05                                                                              | 833.85                                                                              |
| T / K                                                              | 100(2)                                                                                          | 100(2)                                                                                          | 99.99(10)                                                                           | 99.97(10)                                                                           | 106.7                                                                               | 298(2)                                                                              |
| Crystal system                                                     | Monoclinic                                                                                      | Monoclinic                                                                                      | Monoclinic                                                                          | Monoclinic                                                                          | Triclinic                                                                           | Triclinic                                                                           |
| Space group                                                        | <i>P</i> 2 <sub>1</sub> / <i>c</i>                                                              | <i>C</i> <sub>2</sub>                                                                           | <i>I</i> 2/ <i>a</i>                                                                | <i>I</i> 2/ <i>a</i>                                                                | <i>P</i> $\bar{1}$                                                                  | <i>P</i> $\bar{1}$                                                                  |
| <i>a</i> / Å                                                       | 12.647(3)                                                                                       | 11.7324(2)                                                                                      | 24.6200(2)                                                                          | 24.6439(3)                                                                          | 11.5699(5)                                                                          | 11.7400(11)                                                                         |
| <i>b</i> / Å                                                       | 17.053(3)                                                                                       | 20.7132(3)                                                                                      | 10.20780(9)                                                                         | 10.20305(13)                                                                        | 12.5429(3)                                                                          | 12.5965(13)                                                                         |
| <i>c</i> / Å                                                       | 17.208(3)                                                                                       | 23.3587(4)                                                                                      | 31.7453(3)                                                                          | 31.8756(4)                                                                          | 13.6715(4)                                                                          | 13.7194(14)                                                                         |
| $\alpha$ / (°)                                                     | 90                                                                                              | 90                                                                                              | 90                                                                                  | 90                                                                                  | 88.298(2)                                                                           | 88.186(2)                                                                           |
| $\beta$ / (°)                                                      | 131.69(3)                                                                                       | 95.466(2)                                                                                       | 98.0520(9)                                                                          | 98.5114(11)                                                                         | 73.809(3)                                                                           | 73.7570(10)                                                                         |
| $\gamma$ / (°)                                                     | 90                                                                                              | 90                                                                                              | 90                                                                                  | 90                                                                                  | 87.479(3)                                                                           | 87.479(2)                                                                           |
| <i>V</i> / Å <sup>3</sup>                                          | 2771.2(14)                                                                                      | 5650.71(16)                                                                                     | 7899.46(13)                                                                         | 7926.63(16)                                                                         | 1903.17(12)                                                                         | 1945.6(3)                                                                           |
| <i>Z</i>                                                           | 2                                                                                               | 4                                                                                               | 8                                                                                   | 8                                                                                   | 2                                                                                   | 2                                                                                   |
| D <sub>calc</sub> / g·cm <sup>-3</sup>                             | 1.543                                                                                           | 1.387                                                                                           | 1.428                                                                               | 1.444                                                                               | 1.433                                                                               | 1.423                                                                               |
| <i>F</i> (000)                                                     | 1284                                                                                            | 2456                                                                                            | 3504                                                                                | 3568                                                                                | 844                                                                                 | 860                                                                                 |
| Goodness-of-fit on <i>F</i> <sup>2</sup>                           | 1.153                                                                                           | 1.059                                                                                           | 1.058                                                                               | 1.024                                                                               | 1.038                                                                               | 1.051                                                                               |
| <i>R</i> <sub>int</sub>                                            | 0.1453                                                                                          | 0.0475                                                                                          | 0.0547                                                                              | 0.0371                                                                              | 0.0178                                                                              | 0.0392                                                                              |
| <i>R</i> <sub>1</sub> [ <i>I</i> > 2σ( <i>I</i> )] <sup>[a]</sup>  | 0.0788                                                                                          | 0.0827                                                                                          | 0.0432                                                                              | 0.0389                                                                              | 0.0290                                                                              | 0.0632                                                                              |
| <i>wR</i> <sub>2</sub> [ <i>I</i> > 2σ( <i>I</i> )] <sup>[b]</sup> | 0.2015                                                                                          | 0.2124                                                                                          | 0.1082                                                                              | 0.0947                                                                              | 0.0669                                                                              | 0.1504                                                                              |
| <i>R</i> <sub>1</sub> (all data) <sup>[a]</sup>                    | 0.0802                                                                                          | 0.0832                                                                                          | 0.0440                                                                              | 0.0407                                                                              | 0.0339                                                                              | 0.0870                                                                              |
| <i>wR</i> <sub>2</sub> (all data) <sup>[b]</sup>                   | 0.2023                                                                                          | 0.2129                                                                                          | 0.1088                                                                              | 0.0958                                                                              | 0.0698                                                                              | 0.1597                                                                              |
| <i>CCDC</i>                                                        | 2075018                                                                                         | 2075019                                                                                         | 2075020                                                                             | 2075021                                                                             | 2075022                                                                             | 2075023                                                                             |

$$[a] R = \sum(|F_o| - |F_c|) / \sum|F_o|.$$

$$[b] wR = [\sum w(|F_o|^2 - |F_c|^2)^2 / \sum w(F_o^2)]^{1/2}.$$

**Table S2.** Selected bond length (Å) and angles (°) for **1-6**.

| <b>1</b>   |          |                     |                |
|------------|----------|---------------------|----------------|
| Cu(1)-I(1) | 2.642(2) | P(1)-Cu(1)-I(1)     | 118.73(8)      |
| Cu(1)-P(1) | 2.199(3) | N(1)-Cu(1)-I(1)     | 107.7(2)       |
| Cu(1)-N(1) | 2.091(7) | N(1)-Cu(1)-P(1)     | 120.0(2)       |
| Cu(1)-N(2) | 2.101(7) | N(1)-Cu(1)-N(2)     | 80.4(3)        |
|            |          | N(2)-Cu(1)-I(1)     | 101.0(2)       |
|            |          | N(2)-Cu(1)-P(1)     | 121.9(2)       |
|            |          |                     | Dihedral Angle |
|            |          | I1-Cu1-P1/N1-Cu1-N2 | 94.370         |

---

**2**

---

|            |            |                     |                |
|------------|------------|---------------------|----------------|
| Cu(1)-P(1) | 2.2411(18) | N(1)-Cu(1)-P(1)     | 112.57(18)     |
| Cu(1)-N(2) | 2.123(6)   | N(2)-Cu(1)-P(1)     | 117.37(17)     |
| Cu(1)-N(1) | 2.095(6)   | N(2)-Cu(1)-N(1)     | 80.3(2)        |
| Cu(1)-N(3) | 1.941(9)   | N(3)-Cu(1)-P(1)     | 115.0(3)       |
| Cu(2)-P(2) | 2.2372(19) | N(3)-Cu(1)-N(1)     | 107.9(3)       |
| Cu(2)-N(7) | 2.095(6)   | N(3)-Cu(1)-N(2)     | 117.9(3)       |
| Cu(2)-N(6) | 2.123(7)   | N(7)-Cu(2)-P(2)     | 116.62(17)     |
| Cu(2)-N(8) | 1.943(8)   | N(7)-Cu(2)-N(6)     | 79.5(2)        |
|            |            | N(6)-Cu(2)-P(2)     | 116.29(17)     |
|            |            | N(8)-Cu(2)-P(2)     | 115.1(2)       |
|            |            | N(8)-Cu(2)-N(7)     | 112.0(3)       |
|            |            | N(8)-Cu(2)-N(6)     | 112.5(3)       |
|            |            |                     | Dihedral Angle |
|            |            | P1-Cu1-N3/N1-Cu1-N2 | 87.516         |
|            |            | P2-Cu2-N8/N6-Cu2-N7 | 90.423         |

---

**3**

---

|            |            |                     |                |
|------------|------------|---------------------|----------------|
| Cu(1)-P(1) | 2.2505(6)  | P(1)-Cu(1)-P(2)     | 107.55(2)      |
| Cu(1)-P(2) | 2.2563(6)  | N(1)-Cu(1)-P(2)     | 121.45(5)      |
| Cu(1)-N(1) | 2.0689(18) | N(1)-Cu(1)-P(1)     | 112.39(5)      |
| Cu(1)-N(2) | 2.0673(18) | N(2)-Cu(1)-P(2)     | 116.32(5)      |
|            |            | N(2)-Cu(1)-P(1)     | 115.92(5)      |
|            |            | N(1)-Cu(1)-N(2)     | 81.81(7)       |
|            |            |                     | Dihedral Angle |
|            |            | P1-Cu1-P2/N1-Cu1-N2 | 86.407         |

---

**4**

---

|            |            |                     |                |
|------------|------------|---------------------|----------------|
| Cu(1)-P(1) | 2.2537(6)  | P(2)-Cu(1)-P(1)     | 107.77(2)      |
| Cu(1)-P(2) | 2.2518(6)  | N(1)-Cu(1)-P(2)     | 115.96(5)      |
| Cu(1)-N(1) | 2.0664(17) | N(1)-Cu(1)-P(1)     | 116.61(5)      |
| Cu(1)-N(2) | 2.0672(17) | N(2)-Cu(1)-N(1)     | 81.87(7)       |
|            |            | N(2)-Cu(1)-P(2)     | 112.01(5)      |
|            |            | N(2)-Cu(1)-P(1)     | 121.15(5)      |
|            |            |                     | Dihedral Angle |
|            |            | P1-Cu1-P2/N1-Cu1-N2 | 86.441         |

---

**5**

---

|            |            |                 |             |
|------------|------------|-----------------|-------------|
| Cu(1)-P(1) | 2.2304(5)  | P(1)-Cu(1)-P(2) | 104.855(19) |
| Cu(1)-P(2) | 2.2417(5)  | N(2)-Cu(1)-P(1) | 110.65(4)   |
| Cu(1)-N(1) | 2.0606(16) | N(2)-Cu(1)-P(2) | 114.28(5)   |

|            |            |                     |                |
|------------|------------|---------------------|----------------|
| Cu(1)-N(2) | 2.0710(15) | N(1)-Cu(1)-P(1)     | 116.30(4)      |
|            |            | N(1)-Cu(1)-P(2)     | 127.07(5)      |
|            |            | N(2)-Cu(1)-N(1)     | 81.48(6)       |
|            |            |                     | Dihedral Angle |
|            |            | P1-Cu1-P2/N1-Cu1-N2 | 91.822         |
| <b>6</b>   |            |                     |                |
| Cu(1)-N(3) | 2.054(4)   | N(3)-Cu(1)-N(4)     | 80.70(15)      |
| Cu(1)-N(4) | 2.061(3)   | N(3)-Cu(1)-P(1)     | 127.51(11)     |
| Cu(1)-P(1) | 2.2327(12) | N(3)-Cu(1)-P(2)     | 116.18(10)     |
| Cu(1)-P(2) | 2.2239(14) | N(4)-Cu(1)-P(1)     | 115.06(10)     |
|            |            | N(4)-Cu(1)-P(2)     | 110.46(12)     |
|            |            | P(2)-Cu(1)-P(1)     | 104.67(5)      |
|            |            |                     | Dihedral Angle |
|            |            | P1-Cu1-P2/N3-Cu1-N4 | 91.551         |

**Table S3** Intermolecular  $\pi$ - $\pi$  interactions for complex **1**.

|          | Cg→Cg                      | Distance / Å | Slippage / Å |
|----------|----------------------------|--------------|--------------|
| <b>1</b> | Cg(20)→Cg(20) <sup>i</sup> | 3.698(7)     | 1.442        |

Cg(20) = N1-C2-C3-C4-C5-C6

Symmetric codes: <sup>i</sup> 1-x, 1-y, 1-z

**Table S4** Intermolecular C-H $\cdots$  $\pi$  interactions for complex **2**.

|          | C-H→Cg                    | H $\cdots$ Cg / Å | C-H $\cdots$ Cg / ° | C $\cdots$ Cg / Å | C-H $\cdots$ $\pi$ / ° |
|----------|---------------------------|-------------------|---------------------|-------------------|------------------------|
| <b>2</b> | C9-H9→Cg(10) <sup>i</sup> | 2.89              | 146                 | 3.7188            | 68                     |

Cg(10) = C23-C24-C25-C26-C27-C28

Symmetric codes: <sup>i</sup> -1+x, y, z

**Table S5** Intermolecular  $\pi$ - $\pi$  interactions for complex **3**.

|          | Cg→Cg                    | Distance / Å | Slippage / Å |
|----------|--------------------------|--------------|--------------|
| <b>3</b> | Cg(3)→Cg(3) <sup>i</sup> | 3.6114       | 1.442        |

Cg(3) = N1-C1-C2-C3-C4-C5

Symmetric codes: <sup>i</sup> 1/2-x, 1/2-y, 1/2-z

**Table S6** Intermolecular C-H $\cdots$  $\pi$  interactions for complex **3**.

|          | C-H→Cg                       | H $\cdots$ Cg / Å | C-H $\cdots$ Cg / ° | C $\cdots$ Cg / Å | C-H $\cdots$ $\pi$ / ° |
|----------|------------------------------|-------------------|---------------------|-------------------|------------------------|
| <b>3</b> | C11-H11→Cg(9) <sup>i</sup>   | 2.70              | 155                 | 3.569(2)          | 72                     |
|          | C20-H20A→Cg(5) <sup>ii</sup> | 2.97              | 139                 | 3.758(3)          | 34                     |
|          | C31-H31→Cg(9) <sup>iii</sup> | 2.97              | 161                 | 3.859(3)          | 86                     |

Cg(5) = N4-C15-C16-C19-C18-C17

Cg(9) = C34-C35-C36-C37-C38-C39

Symmetric codes: <sup>i</sup> 1/2-x, 1/2-y, 1/2-z; <sup>ii</sup> 1-x, 1-y, 1-z; <sup>iii</sup> x, -1+y, z



**Table S7** Typical hydrogen bonds in asymmetric units for complexes **3**.

|          | Hydrogen bonds               | D-H / Å | H...A / Å | D...A / Å | D-H...A / ° |
|----------|------------------------------|---------|-----------|-----------|-------------|
| <b>3</b> | C2-H2...F1 <sup>i</sup>      | 0.93    | 2.44      | 3.267(3)  | 149         |
|          | C19-H19...F4 <sup>ii</sup>   | 0.93    | 2.40      | 3.271(4)  | 155         |
|          | C20-H20B...F3 <sup>iii</sup> | 0.97    | 2.47      | 3.426(3)  | 168         |
|          | C33-H33A...F4 <sup>iii</sup> | 0.97    | 2.52      | 3.423(3)  | 156         |
|          | C35-H35...F3 <sup>iii</sup>  | 0.93    | 2.49      | 3.378(3)  | 159         |
|          | C42-H42...F2                 | 0.93    | 2.40      | 3.168(3)  | 140         |

Symmetric codes: <sup>i</sup> 1/2-x, 1/2-y, 1/2-z; <sup>ii</sup> 1/2-x, y, 1-z; <sup>iii</sup> 1/2+x, 1-y, z**Table S8** Intermolecular  $\pi$ - $\pi$  interactions for complex **4**.

|          | Cg→Cg                    | Distance / Å | Slippage / Å |
|----------|--------------------------|--------------|--------------|
| <b>4</b> | Cg(4)→Cg(4) <sup>i</sup> | 3.5841       | 1.404        |

Cg(4) = N2-C6-C7-C8-C9-C10

Symmetric codes: <sup>i</sup> 1/2-x, 3/2-y, 1/2-z**Table S9** Intermolecular C-H... $\pi$  interactions for complex **4**.

|          | C-H→Cg                       | H...Cg / Å | C-H...Cg / ° | C...Cg / Å | C-H... $\pi$ / ° |
|----------|------------------------------|------------|--------------|------------|------------------|
| <b>4</b> | C12-H12→Cg(10) <sup>i</sup>  | 2.64       | 156          | 3.514(2)   | 70               |
|          | C20-H20B→Cg(5) <sup>ii</sup> | 2.97       | 140          | 3.761(3)   | 35               |

Cg(10) = C40-C41-C42-C43-C44-C45

Cg(5) = N4-C15-C16-C17-C18-C19

Symmetric codes: <sup>i</sup> 1/2-x, 3/2-y, 1/2-z; <sup>ii</sup> 1-x, 1-y, 1-z**Table S10** Typical hydrogen bonds in asymmetric units for complexes **4**.

|          | Hydrogen bonds              | D-H / Å | H...A / Å | D...A / Å | D-H...A / ° |
|----------|-----------------------------|---------|-----------|-----------|-------------|
| <b>4</b> | C9-H9...O4 <sup>i</sup>     | 0.93    | 2.50      | 3.319(3)  | 147         |
|          | C17-H17...O1 <sup>ii</sup>  | 0.93    | 2.46      | 3.316(4)  | 154         |
|          | C20-H20A...O2               | 0.97    | 2.54      | 3.496(4)  | 168         |
|          | C33-H33B...O1               | 0.97    | 2.54      | 3.443(3)  | 155         |
|          | C36-H36...O3 <sup>iii</sup> | 0.93    | 2.44      | 3.182(3)  | 137         |
|          | C45-H45...O2                | 0.93    | 2.57      | 3.456(3)  | 159         |

Symmetric codes: <sup>i</sup> 1-x, 1/2+y, 1/2-z; <sup>ii</sup> 1-x, 1-y, 1-z; <sup>iii</sup> -1/2+x, 1-y, z**Table S11** Intermolecular  $\pi$ - $\pi$  interactions for complex **5**.

|          | Cg→Cg                    | Distance / Å | Slippage / Å |
|----------|--------------------------|--------------|--------------|
| <b>5</b> | Cg(6)→Cg(6) <sup>i</sup> | 3.7476       | 1.722        |

Cg(4) = C4-C5-C6-C7-C12-C11

Symmetric codes: <sup>i</sup> 1-x, 2-y, 1-z**Table S12** Intermolecular C-H... $\pi$  interactions for complex **5**.

|  | C-H→Cg | H...Cg / Å | C-H...Cg angle / ° | C...Cg distance / Å | C-H... $\pi$ / ° |
|--|--------|------------|--------------------|---------------------|------------------|
|--|--------|------------|--------------------|---------------------|------------------|

|          |                              |      |     |          |    |
|----------|------------------------------|------|-----|----------|----|
| <b>5</b> | C8-H8→Cg(10) <sup>i</sup>    | 2.94 | 153 | 3.813(2) | 72 |
|          | C13-H13B→Cg(5) <sup>ii</sup> | 2.99 | 114 | 3.514(2) | 25 |

Cg(10) = 38-C39-C40-C41-C42-C43

Cg(5) = N4-C15-C16-C17-C18-C19

Symmetric codes: <sup>i</sup> 1-x, 2-y, 1-z; <sup>ii</sup> 2-x, 1-y, -z

**Table S13** Typical hydrogen bonds in asymmetric units for complexes **5**.

| Hydrogen bonds              | D-H / Å | H...A / Å | D...A / Å | D-H...A / ° |
|-----------------------------|---------|-----------|-----------|-------------|
| <b>5</b> C1-H1...F1         | 0.95    | 2.32      | 3.264(2)  | 173         |
| C3-H3...F4 <sup>i</sup>     | 0.95    | 2.24      | 3.075(4)  | 147         |
| C10-H10...F2 <sup>ii</sup>  | 0.95    | 2.49      | 3.297(3)  | 143         |
| C13-H13A...F1               | 0.99    | 2.49      | 3.432(2)  | 158         |
| C14-H14B...F1               | 0.99    | 2.49      | 3.422(2)  | 157         |
| C29-H29...F1 <sup>iii</sup> | 0.95    | 2.53      | 3.466(3)  | 168         |
| C34-H34...F3 <sup>ii</sup>  | 0.95    | 2.36      | 3.287(3)  | 166         |

Symmetric codes: <sup>i</sup> 2-x, 2-y, 1-z; <sup>ii</sup> -1+x, y, z; <sup>iii</sup> 2-x, 1-y, 1-z

**Table S14** Intermolecular  $\pi$ - $\pi$  interactions for complex **6**.

|                                     | Cg→Cg | Distance / Å | Slippage / Å |
|-------------------------------------|-------|--------------|--------------|
| <b>6</b> Cg(10)→Cg(10) <sup>i</sup> |       | 3.749(3)     | 1.652        |

Cg(4) = C35-C36-C37-C38-C43-C42

Symmetric codes: <sup>i</sup> 2-x, 1-y, -z

**Table S15** Typical hydrogen bonds in asymmetric units for complexes **6**.

| Hydrogen bonds             | D-H / Å | H...A / Å | D...A / Å | D-H...A / ° |
|----------------------------|---------|-----------|-----------|-------------|
| <b>6</b> C2-H2B...O2       | 0.97    | 2.55      | 3.486(6)  | 162         |
| C18-H18...O1 <sup>i</sup>  | 0.93    | 2.55      | 3.453(9)  | 163         |
| C32-H32...O3 <sup>i</sup>  | 0.93    | 2.53      | 3.324(7)  | 143         |
| C39-H39...O4 <sup>ii</sup> | 0.93    | 2.37      | 3.176(10) | 145         |
| C41-H41...O2               | 0.93    | 2.37      | 3.303(7)  | 175         |

Symmetric codes: <sup>i</sup> 1+x, y, z; <sup>ii</sup> 1-x, 1-y, -z

**Table S16.** Energy, oscillator strength and major contribution of the calculated transitions for **1-6**.

| Excited state          | Energy / eV<br>(/ nm) | Oscillator strength | Major contribution (%)          |
|------------------------|-----------------------|---------------------|---------------------------------|
| <b>1</b><br>absorption | 4.8393<br>(256.20)    | 0.0987              | HOMO-26→LUMO+2 (2.73)           |
|                        |                       |                     | HOMO-25 → LUMO (3.36)           |
|                        |                       |                     | HOMO-16 → LUMO+2 (2.56)         |
|                        |                       |                     | HOMO-14 → LUMO+6 (8.36)         |
|                        |                       |                     | HOMO-14 → LUMO+7 (3.83)         |
|                        |                       |                     | HOMO-13 → LUMO+4 (2.51)         |
|                        |                       |                     | <b>HOMO-13 → LUMO+5 (30.78)</b> |

|          |                   |                    |                                 |
|----------|-------------------|--------------------|---------------------------------|
|          |                   |                    | HOMO-13 → LUMO+8 (12.08)        |
|          |                   |                    | HOMO-10 → LUMO+13 (2.48)        |
| <b>1</b> | <b>emission</b>   | 2.0756<br>(597.34) | 0.0251                          |
|          |                   |                    | HOMO-9 → LUMO+1 (2.07)          |
|          |                   |                    | HOMO-7 → LUMO (5.04)            |
|          |                   |                    | HOMO-7 → LUMO+1 (3.63)          |
|          |                   |                    | HOMO-6 → LUMO (39.15)           |
|          |                   |                    | HOMO-5 → LUMO (3.18)            |
|          |                   |                    | <b>HOMO-4 → LUMO (40.71)</b>    |
|          |                   |                    | HOMO-2 → LUMO (3.31)            |
| <b>2</b> | <b>absorption</b> | 4.7933<br>(258.66) | 0.1715                          |
|          |                   |                    | HOMO-28 → LUMO+1 (3.56)         |
|          |                   |                    | HOMO-27 → LUMO+1 (12.19)        |
|          |                   |                    | HOMO-26 → LUMO+1 (5.35)         |
|          |                   |                    | HOMO-24 → LUMO+2 (6.92)         |
|          |                   |                    | HOMO-24 → LUMO+3 (2.98)         |
|          |                   |                    | <b>HOMO-23 → LUMO+1 (12.93)</b> |
|          |                   |                    | HOMO-22 → LUMO+1 (7.11)         |
|          |                   |                    | HOMO-21 → LUMO+1 (4.41)         |
|          |                   |                    | HOMO-20 → LUMO+1 (3.61)         |
|          |                   |                    | HOMO-19 → LUMO+1 (8.75)         |
|          |                   |                    | HOMO-19 → LUMO+3 (2.37)         |
|          |                   |                    | HOMO-13 → LUMO+3 (6.97)         |
|          |                   |                    | HOMO-6 → LUMO+12 (2.90)         |
| <b>2</b> | <b>emission</b>   | 3.3366<br>(530.61) | 0.0270                          |
|          |                   |                    | HOMO-8 → LUMO (3.18)            |
|          |                   |                    | HOMO-8 → LUMO+1 (7.00)          |
|          |                   |                    | HOMO-7 → LUMO (33.23)           |
|          |                   |                    | <b>HOMO-6 → LUMO (39.30)</b>    |
|          |                   |                    | HOMO-5 → LUMO (9.50)            |
|          |                   |                    | HOMO-4 → LUMO (3.78)            |
| <b>3</b> | <b>4</b>          | 4.8558<br>(255.33) | 0.1706                          |
|          | <b>absorption</b> |                    |                                 |
|          |                   |                    | <b>HOMO-16 → LUMO (17.51)</b>   |
|          |                   |                    | HOMO-14 → LUMO+1 (2.91)         |
|          |                   |                    | HOMO-11 → LUMO+1 (2.54)         |
|          |                   |                    | HOMO-9 → LUMO+2 (2.30)          |
|          |                   |                    | HOMO-3 → LUMO+3 (12.02)         |
|          |                   |                    | HOMO-2 → LUMO+5 (17.06)         |
|          |                   |                    | HOMO-1 → LUMO+10 (15.45)        |
|          |                   |                    | HOMO-1 → LUMO+11 (9.06)         |
| <b>3</b> | <b>4</b>          | 2.3920<br>(518.32) | 0.1144                          |
|          | <b>emission</b>   |                    |                                 |
|          |                   |                    | <b>HOMO-1 → LUMO (98.00)</b>    |
| <b>5</b> | <b>6</b>          | 4.6879<br>(264.48) | 0.1386                          |
|          | <b>absorption</b> |                    |                                 |
|          |                   |                    | <b>HOMO-15 → LUMO (21.55)</b>   |
|          |                   |                    | HOMO-15 → LUMO+1 (2.80)         |
|          |                   |                    | HOMO-12 → LUMO+1 (4.50)         |
|          |                   |                    | HOMO-5 → LUMO+1 (4.15)          |
|          |                   |                    | HOMO-4 → LUMO+1 (6.30)          |
|          |                   |                    | HOMO-3 → LUMO+2 (10.06)         |

|          |          |        |        |                      |                |
|----------|----------|--------|--------|----------------------|----------------|
|          |          |        |        | HOMO-2 → LUMO+5      | (20.45)        |
|          |          |        |        | HOMO → LUMO+11       | (10.66)        |
| <b>5</b> | <b>6</b> | 2.5319 | 0.0198 | HOMO-3 → LUMO        | (8.03)         |
| emission | (489.69) |        |        | HOMO-2 → LUMO        | (28.55)        |
|          |          |        |        | <b>HOMO-1 → LUMO</b> | <b>(59.20)</b> |

**Table S17.** Calculated molecular frontier orbital energy / eV for **1-6**.

| Frontier orbital | <b>1</b>      | <b>2</b>      | <b>3 and 4</b> | <b>5 and 6</b> |
|------------------|---------------|---------------|----------------|----------------|
| HOMO-29          | -7.473        | -7.532        | -11.858        | -11.849        |
| HOMO-28          | -7.411        | -7.524        | -11.810        | -11.807        |
| HOMO-27          | -7.329        | -7.495        | -11.758        | -11.761        |
| HOMO-26          | -7.305        | -7.493        | -11.626        | -11.665        |
| HOMO-25          | -7.267        | -7.390        | -11.549        | -11.520        |
| HOMO-24          | -7.234        | -7.332        | -11.462        | -11.331        |
| HOMO-23          | -7.197        | -7.308        | -11.341        | -11.256        |
| HOMO-22          | -7.155        | -7.267        | -11.307        | -11.125        |
| HOMO-21          | -7.087        | -7.220        | -11.254        | -10.983        |
| HOMO-20          | -7.051        | -7.187        | -11.174        | -10.965        |
| HOMO-19          | -6.974        | -7.164        | -10.947        | -10.933        |
| HOMO-18          | -6.951        | -7.111        | -10.344        | -10.418        |
| HOMO-17          | -6.847        | -7.019        | -9.824         | -9.909         |
| HOMO-16          | -6.797        | -7.000        | -9.812         | -9.731         |
| HOMO-15          | -6.737        | -6.863        | -9.637         | -9.576         |
| HOMO-14          | -6.436        | -6.808        | -9.575         | -9.542         |
| HOMO-13          | -6.399        | -6.790        | -9.519         | -9.516         |
| HOMO-12          | -6.328        | -6.246        | -9.478         | -9.457         |
| HOMO-11          | -6.276        | -6.217        | -9.421         | -9.426         |
| HOMO-10          | -5.930        | -6.206        | -9.362         | -9.389         |
| HOMO-9           | -5.870        | -6.142        | -9.362         | -9.351         |
| HOMO-8           | -5.792        | -6.131        | -9.343         | -9.300         |
| HOMO-7           | -5.687        | -6.058        | -9.312         | -9.288         |
| HOMO-6           | -5.588        | <b>-5.785</b> | -9.263         | -9.248         |
| HOMO-5           | -5.114        | -5.457        | -9.247         | -9.225         |
| HOMO-4           | <b>-5.029</b> | -5.427        | -9.149         | -9.059         |
| HOMO-3           | -5.001        | -5.417        | -8.694         | -8.697         |
| HOMO-2           | -4.952        | -5.329        | -8.540         | -8.451         |
| HOMO-1           | -4.898        | -5.149        | <b>-7.922</b>  | <b>-7.931</b>  |
| HOMO             | -4.825        | -5.012        | -7.842         | -7.857         |
| LUMO             | <b>-2.191</b> | <b>-2.220</b> | <b>-4.696</b>  | <b>-4.524</b>  |
| LUMO+1           | -2.154        | -2.144        | -4.573         | -4.304         |
| LUMO+2           | -2.047        | -2.097        | -3.404         | -3.381         |
| LUMO+3           | -2.011        | -2.029        | -3.224         | -3.174         |
| LUMO+4           | -1.154        | -1.128        | -3.128         | -3.157         |

|         |        |        |        |        |
|---------|--------|--------|--------|--------|
| LUMO+5  | -1.050 | -1.012 | -2.990 | -3.075 |
| LUMO+6  | -0.901 | -0.920 | -2.921 | -3.011 |
| LUMO+7  | -0.874 | -0.838 | -2.889 | -2.956 |
| LUMO+8  | -0.805 | -0.822 | -2.755 | -2.827 |
| LUMO+9  | -0.804 | -0.756 | -2.732 | -2.682 |
| LUMO+10 | -0.691 | -0.711 | -2.652 | -2.628 |
| LUMO+11 | -0.675 | -0.595 | -2.530 | -2.469 |
| LUMO+12 | -0.550 | -0.424 | -2.398 | -2.418 |
| LUMO+13 | -0.447 | -0.376 | -2.145 | -2.198 |
| LUMO+14 | -0.322 | -0.259 | -2.050 | -1.939 |
| LUMO+15 | -0.217 | -0.243 | -1.631 | -1.648 |
| LUMO+16 | -0.193 | -0.188 | -1.396 | -1.426 |
| LUMO+17 | -0.137 | -0.103 | -1.360 | -1.151 |
| LUMO+18 | 0.512  | 0.528  | -1.082 | -1.117 |
| LUMO+19 | 0.548  | 0.617  | -0.963 | -1.053 |
| LUMO+20 | 0.660  | 0.668  | -0.922 | -0.940 |
| LUMO+21 | 0.678  | 0.766  | -0.853 | -0.798 |
| LUMO+22 | 0.834  | 0.867  | -0.742 | -0.749 |
| LUMO+23 | 0.947  | 0.970  | -0.622 | -0.710 |
| LUMO+24 | 1.001  | 1.048  | -0.560 | -0.649 |
| LUMO+25 | 1.105  | 1.068  | -0.438 | -0.431 |
| LUMO+26 | 1.119  | 1.099  | -0.371 | -0.363 |
| LUMO+27 | 1.137  | 1.131  | -0.303 | -0.275 |
| LUMO+28 | 1.222  | 1.216  | -0.196 | -0.223 |
| LUMO+29 | 1.298  | 1.333  | -0.123 | -0.188 |

---
